# Supplementary material
Source: MDPI journal article supplement (https://www.mdpi.com/2673-2688/2/3/20)
Supplement: s1 [file s1]

# Supplementary Materials: COVID-19 diagnosis from chest CT Scans: a weakly supervised CNN-LSTM approach

Mustafa Kara <sup>1</sup>, Zeynep Öztürk <sup>1</sup>, Sergin Akpek and Ayşegül Turupcu <sup>1,\*</sup>

For the evaluation of the similarity between activation maps of the original image and the perturbed image which are based on Grad-CAM, cosine similarity (CS) is used. First, the perturbation is applied on the original image and activation map is obtained from Grad-CAM. After flattening activation map of the perturbed image,  $P$  vector is obtained. This is compared with the vector of activation map of the original image in the perturbed state, which is  $O_p$ . The following equation (1) is used to calculate CS in which the two vectorized maps are similar when CS is close to 1.

$$CS = \frac{\overrightarrow{O_p} \cdot \vec{P}}{\|\overrightarrow{O_p}\| \|\vec{P}\|} \quad (1)$$

In the Figure S1, we compared four perturbed states: clockwise rotated (Figure S1.B), counterclockwise rotated (Figure S1.C), 30 pixels right and 15 pixels down translated (Figure S1.D), and 20 pixels left and 15 pixels to up translated (Figure S1.D).

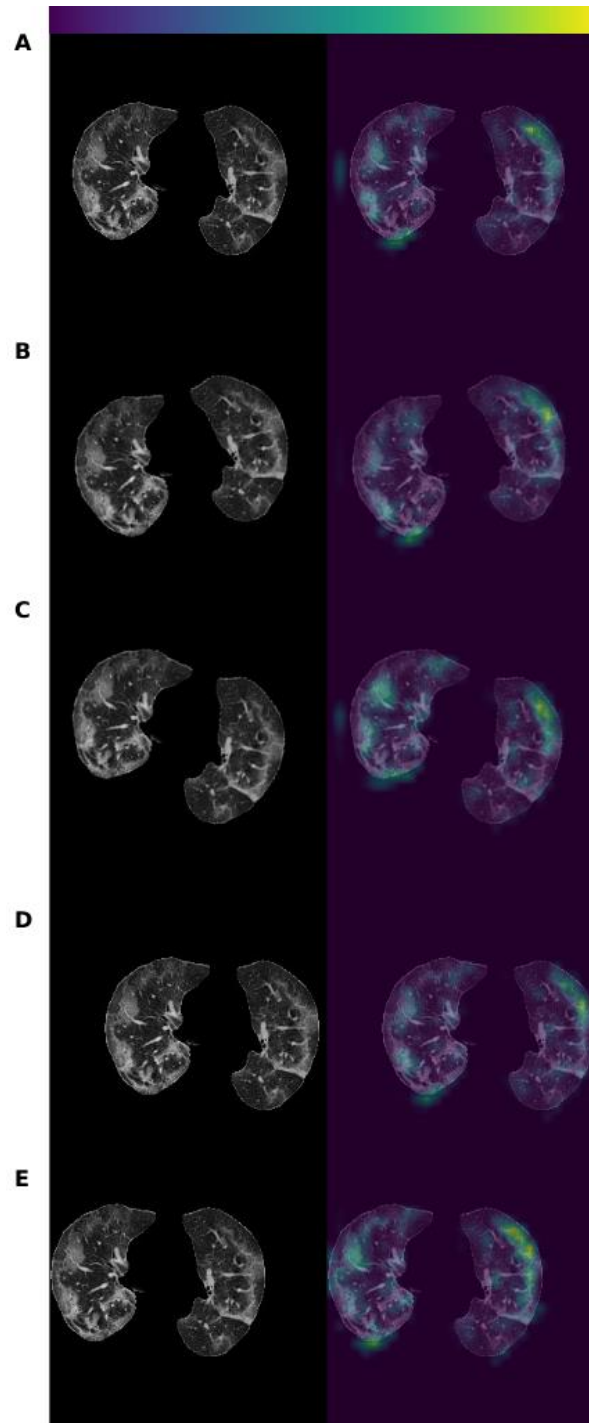

**Figure S1.** Illustration of the original CT slices (left) and activation maps (right) of the original (A) and the perturbed images (B-E) based on Grad-CAM. (A) Original image (left) and its activation map (right) (B) 15-degrees counterclockwise rotation of the original slice (left) and its calculated activation map (right) (CS: 99%), (C) 15-degrees clockwise rotation of the original image (left) and its calculated activation map (right) (CS: 98%), (D) 30 pixels right and 15 pixels down translation of the original image (left) and its calculated activation map (right) (CS 97%), (E) 20 pixels left and 15 pixels to up translation of the original image (left) and its calculated activation map (right) (CS: 99%). Colormaps indicates the importance of the last convolutional layer and colorbar of the activation maps is illustrated at the top panel.
